# Supplementary material
Source: Research Square preprint supplement (doi:10.21203/rs.3.rs-10027792/v1)
Supplement: Supplementary file 1 [file 9913e39f05d09acf073a0d48.docx]

**Functionalized Carbon Nanotubes as Nanoinhibitors of Asphaltene Aggregation: AMolecular Dynamics Approach for Enhanced Oil Recovery**

***Mohamed El Amine Boumeftah1,2, Boumediene Bounaceur1 and Ali Rahmouni2,***

1 Laboratoire de Chimie Physique Macromoléculaire, Département de Chimie, Université Oran1 Ahmed Ben Bella, B.P 1524 El-Menaouer, Oran, Algeria;[bounaceur.boumediene@univ-oran1.dz](mailto:bounaceur.boumediene@univ-oran1.dz),[boumeftah.mohamed.elamine@gmail.com](mailto:boumeftah.mohamed.elamine@gmail.com)*[boumeftah.mohamed@edu.univ-oran1.dz](mailto:boumeftah.mohamed@edu.univ-oran1.dz);

2 Modelling and Calculation Methods Laboratory, University of Saida Dr Moulay Tahar, Saida, Algeria; [rahmouniali21@hotmail.com](mailto:rahmouniali21@hotmail.com)***** [ali.rahmouni@univ-saida.dz](mailto:ali.rahmouni@univ-saida.dz);

**Supplementary information files description**

1. **Molecular PDB files**

The molecular structures used as input of the quantum calculations are provided in pdb files format.

| **Molecule** | **File name** |
| --- | --- |
| **AMM** | Asphaltene.pdb |
| **n-heptane** | n-Heptane.pdb |
| **toluene** | Toluene.pdb |
| **CNT1** | Nanotube.pdb |
| **CNT2** | nanotube_conh2.pdb |
| **CNT3** | nanotube_conhch3.pdb |
| **CNT4** | nanotube_ch2oh.pdb |
| **CNT5** | nanotube_coo-.pdb |

1. **Molecular Dynamics Parameter files**

The .mdp files contain the simulation parameters that control our molecular dynamics runs.

1. **Starting point of the production stage of MD simulation:**

| **System** | **File name** |
| --- | --- |
| **S0** | md_150-S0.gro |
| **S1** | md_150-S1.gro |
| **S2** | md_150-S2.gro |
| **S3** | md_150-S3.gro |
| **S4** | md_150-S4.gro |
| **S5** | md_150-S5.gro |

1. Analysis of MD trajectories
   1. **Radial Distribution Function(RDF) analysis**

| **System** | **Dimer** | **File name** |
| --- | --- | --- |
| **S0** | **Asphaltene-Asphaltene** | rdf-Asp-S0.xvg |
| **S1** | **Asphaltene-Asphaltene** | rdf-Asp-S1.xvg |
| **Asphaltene-CNT** | rdf-CNT-Asp-S1.xvg |
| **S2** | **Asphaltene-Asphaltene** | rdf-Asp-S2.xvg |
| **Asphaltene-CNT** | rdf-CNT-conhh-Asp-S2.xvg |
| **S3** | **Asphaltene-Asphaltene** | rdf-Asp-S3.xvg |
| **Asphaltene-CNT** | rdf-CNT-conhch3-Asp-S3.xvg |
| **S4** | **Asphaltene-Asphaltene** | rdf-Asp-S4.xvg |
| **Asphaltene-CNT** | rdf-CNT-ch2oh-Asp-S4.xvg |
| **S5** | **Asphaltene-Asphaltene** | rdf-Asp-S5.xvg |
| **Asphaltene-CNT** | rdf-CNT-coo--Asp-S5.xvg |

1. **Solvent-accessible surface area(SASA)**

| **System** | **File name** |
| --- | --- |
| **S0** | sasa_S0.xvg |
| **S1** | sasa-S1.xvg |
| **S2** | sasa-S2.xvg |
| **S3** | sasa-S3.xvg |
| **S4** | sasa-S4.xvg |
| **S5** | sasa-S5.xvg |

1. **Occurrence number and size of asphaltene aggregates**

| **System** | **File name** |
| --- | --- |
| **S0** | clusters-S0.xvg |
| **S1** | clusters-S1.xvg |
| **S2** | clusters-S2.xvg |
| **S3** | clusters-S3.xvg |
| **S4** | clusters-S4.xvg |
| **S5** | clusters-S5.xvg |

1. **Non-bonding interaction energies**

| **System** | **Interacting species** | **File name** |
| --- | --- | --- |
| **S0** | **Asphaltene-Asphaltene** | interaction_energy_Asp-S0.xvg |
| **S1** | **Asphaltene-Asphaltene** | interaction_energy_Asp-S1.xvg |
| **Asphaltene-CNT** | interaction_energy_Asp_CNT-S1.xvg |
| **S2** | **Asphaltene-Asphaltene** | interaction_energy_Asp-S2.xvg |
| **Asphaltene-CNT** | interaction_energy_Asp-CNT_conh2-S2.xvg |
| **S3** | **Asphaltene-Asphaltene** | interaction_energy_Asp-S3.xvg |
| **Asphaltene-CNT** | interaction_energy_Asp-CNT_conhch3-S3.xvg |
| **S4** | **Asphaltene-Asphaltene** | interaction_energy_Asp-S4.xvg |
| **Asphaltene-CNT** | interaction_energy_Asp-CNT_ch2oh-S4.xvg |
| **S5** | **Asphaltene-Asphaltene** | interaction_energy_Asp-S5.xvg |
| **Asphaltene-CNT** | interaction_energy_Asp-CNT_coo--S5.xvg |

1. **Time evolutionof Electrostatic and van der Waals interactions energies**
   1. **Electrostaticinteractions energies**

| **System** | **Interacting species** | **File name** |
| --- | --- | --- |
| **S0** | **Asphaltene-Asphaltene** | Coul-Asp-S0.xvg |
| **S1** | **Asphaltene-Asphaltene** | Coul-Asp-S1.xvg |
| **Asphaltene-CNT** | Coul-Asp-CNT-S1.xvg |
| **S2** | **Asphaltene-Asphaltene** | Coul-Asp-S2.xvg |
| **Asphaltene-CNT** | Coul-Asp-CNT-conh2-S2.xvg |
| **S3** | **Asphaltene-Asphaltene** | Coul-Asp-S3.xvg |
| **Asphaltene-CNT** | Coul-Asp-CNT-conhch3-S3.xvg |
| **S4** | **Asphaltene-Asphaltene** | Coul-Asp-S4.xvg |
| **Asphaltene-CNT** | Coul-Asp-CNT-ch2oh-S4.xvg |
| **S5** | **Asphaltene-Asphaltene** | Coul-Asp-S5.xvg |
| **Asphaltene-CNT** | Coul-Asp-CNT-coo--S5.xvg |

- 1. **Van der Waals interactions energies**

| **System** | **Interacting species** | **File name** |
| --- | --- | --- |
| **S0** | **Asphaltene-Asphaltene** | LJ-Asp-S0.xvg |
| **S1** | **Asphaltene-Asphaltene** | LJ-Asp-S1.xvg |
| **Asphaltene-CNT** | LJ-Asp-CNT-S1.xvg |
| **S2** | **Asphaltene-Asphaltene** | LJ-Asp-S2.xvg |
| **Asphaltene-CNT** | LJ-Asp-CNT-conh2-S2.xvg |
| **S3** | **Asphaltene-Asphaltene** | LJ-Asp-S3.xvg |
| **Asphaltene-CNT** | LJ-Asp-CNT-conhch3-S3.xvg |
| **S4** | **Asphaltene-Asphaltene** | LJ-Asp-S4.xvg |
| **Asphaltene-CNT** | LJ-Asp-CNT-ch2oh-S4.xvg |
| **S5** | **Asphaltene-Asphaltene** | LJ-Asp-S5.xvg |
| **Asphaltene-CNT** | LJ-Asp-CNT-coo--S5.xvg |

1. **Time evolution of number of adsorbed asphaltene molecules on CNT surfaces**

| **System** | **File name** |
| --- | --- |
| **S1** | adsorbed_mol_count-com-cnt.xvg |
| **S2** | adsorbed_mol_count-com-conh2.xvg |
| **S3** | adsorbed_mol_count-com-conhch3.xvg |
| **S4** | adsorbed_mol_count-com-ch2oh.xvg |
| **S5** | adsorbed_mol_count-com-coo-.xvg |
